# Supplementary material
Source: PubMed Central journal article supplement (PMC4932783)
Supplement: Supp_Data.pdf [file Supp_Data.pdf]

**Supplemental Material for:**

**Improved Synthesis and In Vitro Evaluation of an Aptamer Ribosomal Toxin Conjugate**

Linsley Kelly, Christina Kratschmer, Keith E Maier, Amy C Yan and Matthew Levy\*

Department of Biochemistry  
Albert Einstein College of Medicine  
1300 Morris Park Ave  
Bronx, NY 10461

\* corresponding author: [matthew.levy@einstsin.yu.edu](mailto:matthew.levy@einstsin.yu.edu)

Key words: aptamer, ribosomal toxin, immunotoxin, PSMA

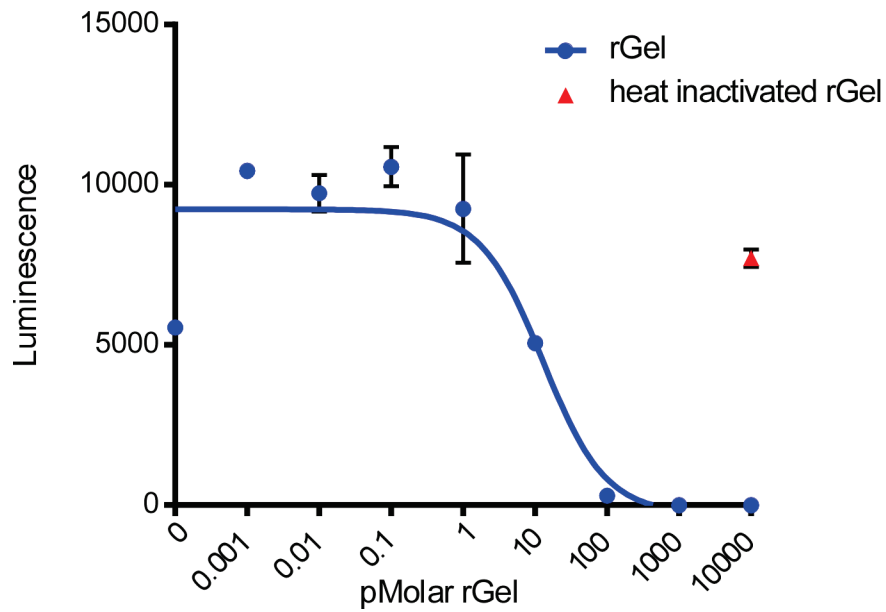

**Figure S1: Activity of rGel following expression and purification, as assessed by inhibition of luciferase mRNA expression in a rabbit reticulocyte assay.** The toxin was incubated with rabbit reticulocyte lysate at increasing concentrations (blue) prior to the addition of luciferase mRNA. Decreasing luminescence suggests a decrease in luciferase production as a result of inactivated ribosomes. To inactivate the toxin (red), rGel was boiled at 99°C prior to incubation with the lysate, inhibiting the toxins ability to cleave the ribosomal RNA.

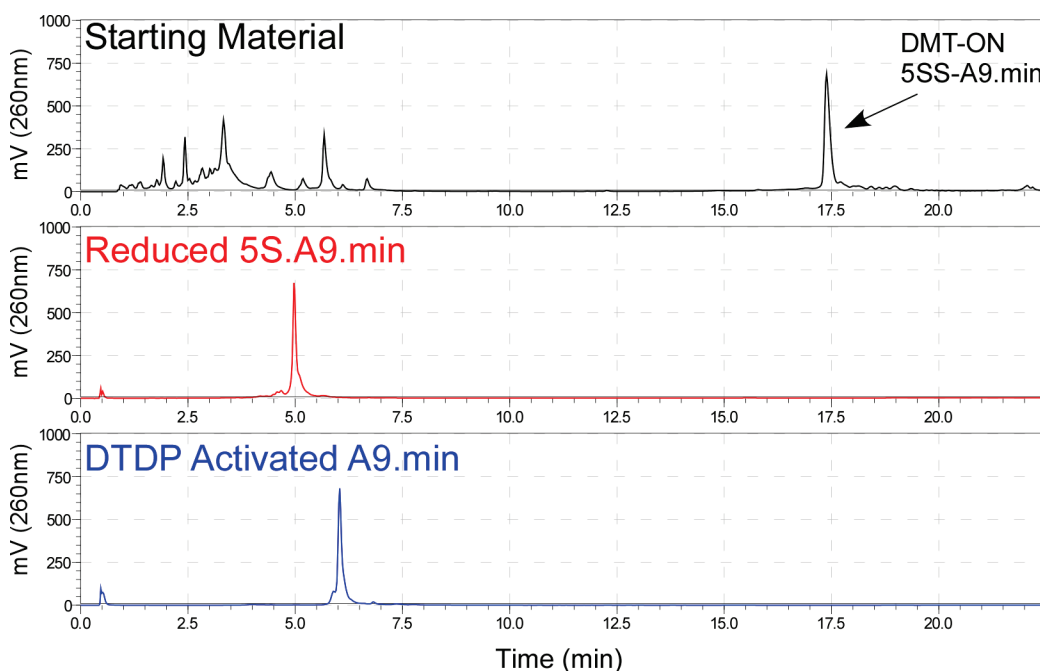

**Figure S2: HPLC traces of aptamer during purification and activation.** (Top) Analytical analysis of DMT-ON A9.min synthesized bearing a 5' thiol modification protected as a disulfide and a 3' inverted dT residue (DMT-ON 5SS-A9.min). The identity of the full length product is as indicated. (Middle) Analysis of the purified, reduced A9.min (5S.A9.min). Reduction of the aptamer was performed as described in the **Methods and Materials**. (Bottom) Analysis of 5S.A9.min following activation with dithiodipyridine. The remainder of the reaction was desalted to remove the excess DTDP and then used for protein conjugation as described in the **Methods and Materials**.
